# Supplementary material
Source: PubMed Central journal article supplement (PMC8092884)
Supplement: AAC.02472-20-s000S1.pdf [file AAC.02472-20-s000S1.pdf]

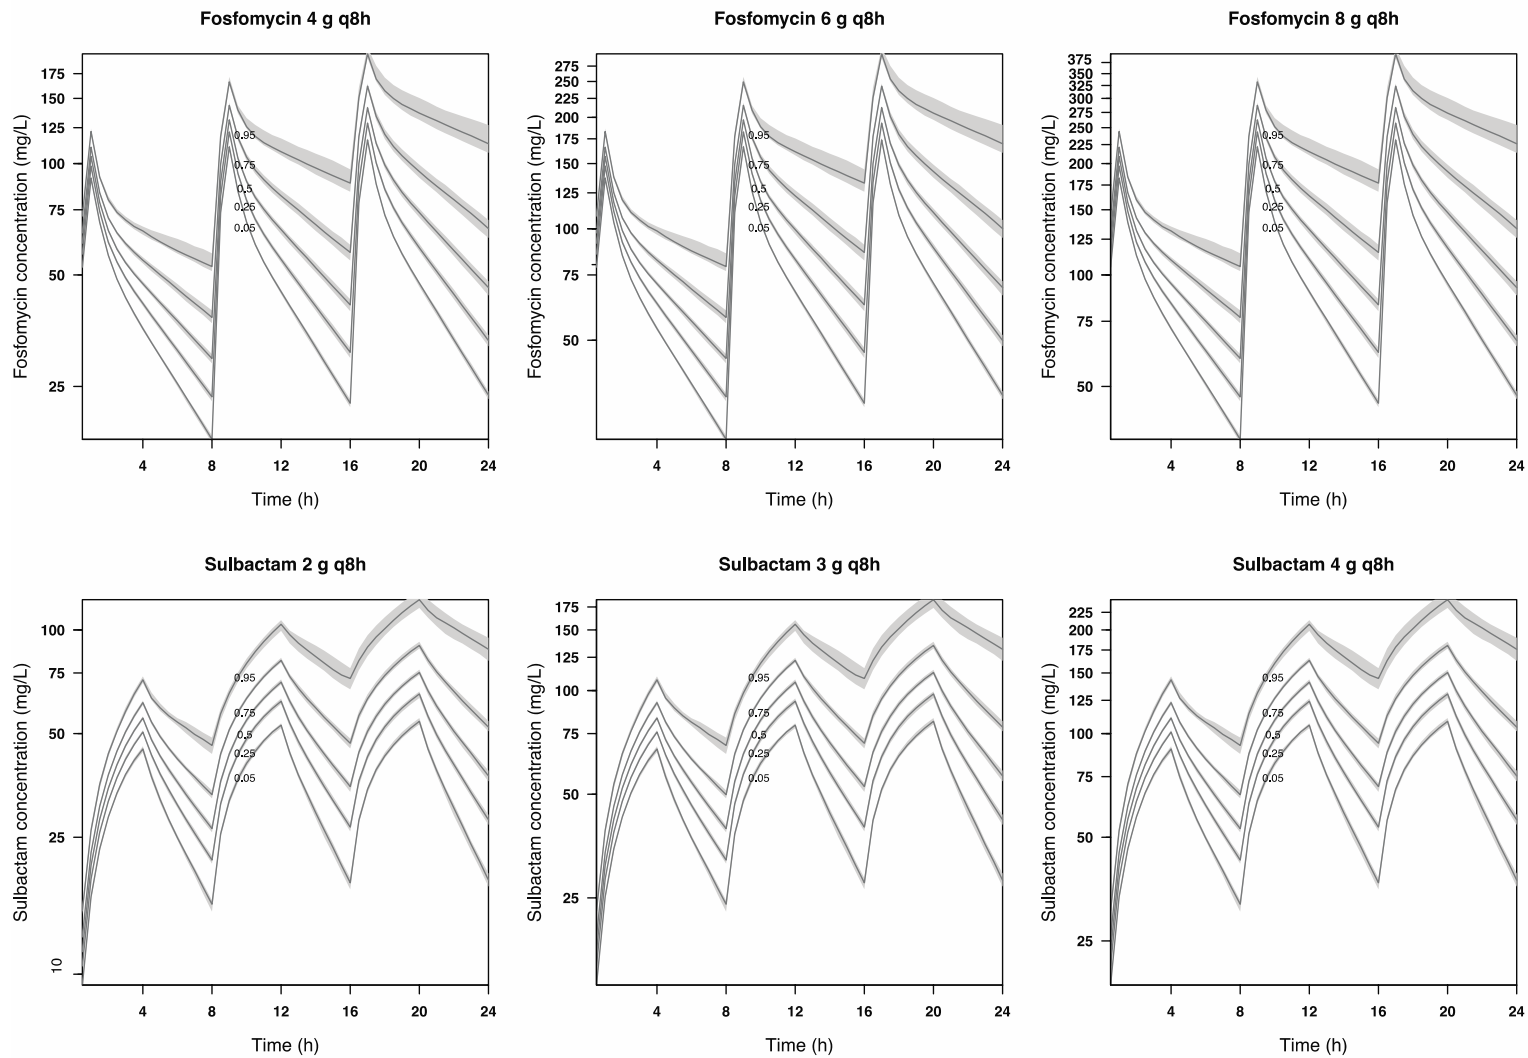

Figure S1: Simulated plasma concentration of meropenem and sulbactam. Grey shading indicates 95% CI; 0.95, 95<sup>th</sup> percentile; 0.75, 75<sup>th</sup> percentile; 0.5, 50<sup>th</sup> percentile; 0.25, 25<sup>th</sup> percentile; 0.05, 5<sup>th</sup> percentile; q8h, every 8 hours.

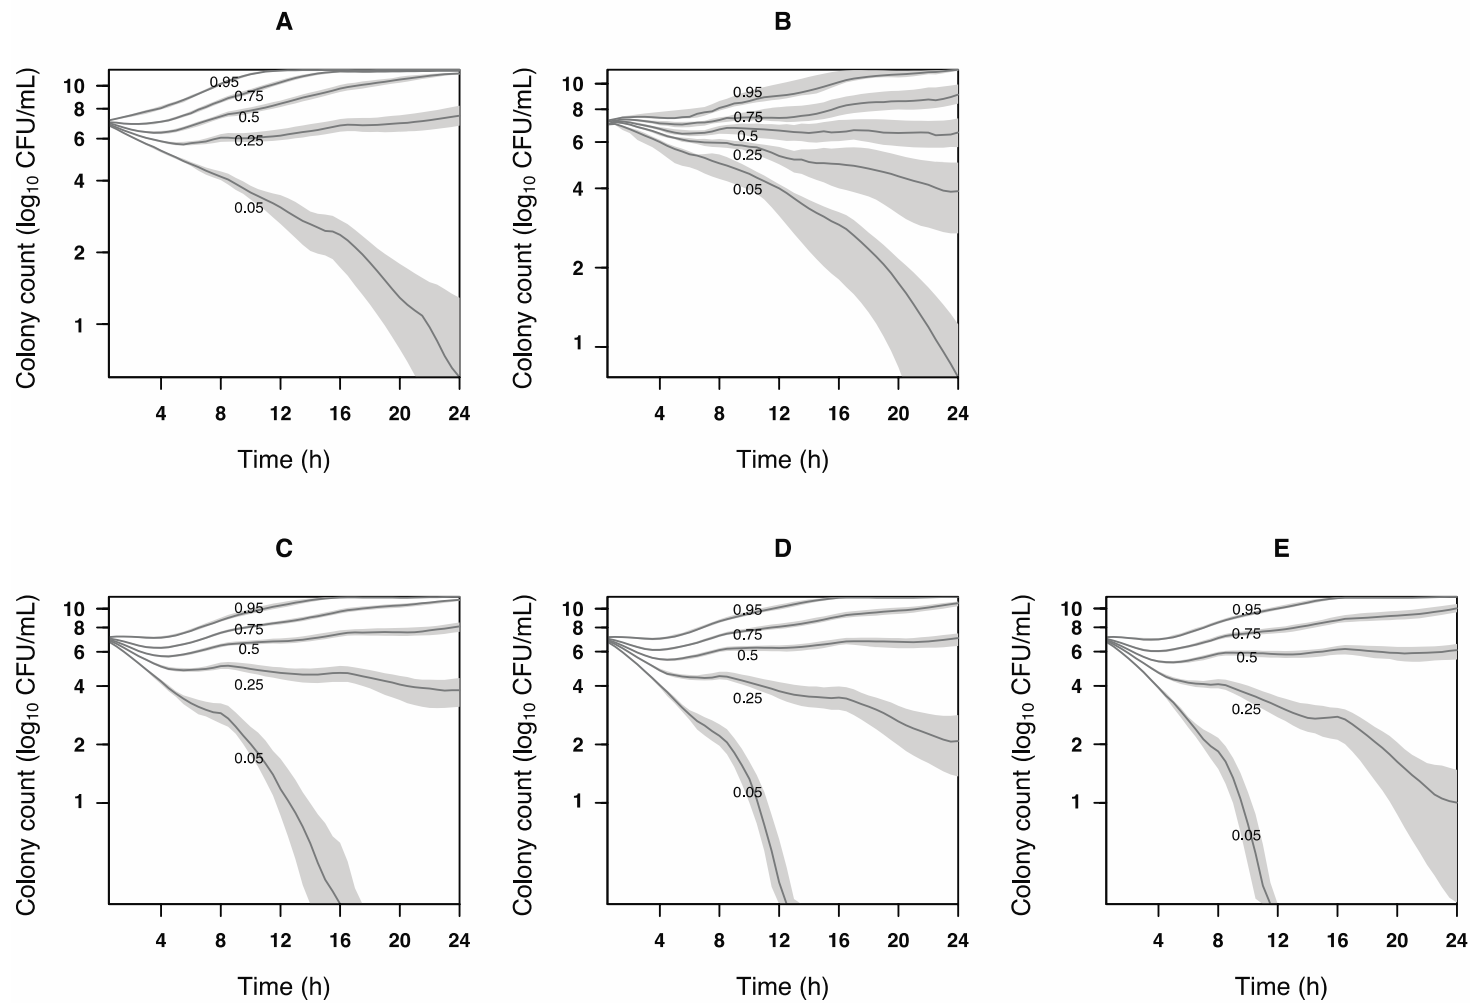

Figure S2: Simulated viable count profiles of carbapenem-resistant *A. baumannii* isolate #79 for monotherapy regimens (A) fosfomycin 8 g q8h; (B) sulbactam 4 g q8h, and combination regimens of sulbactam 2 g q8h with (C) fosfomycin 4 g q8h; (D) fosfomycin 6 g q8h; (E) fosfomycin 8 g q8h, every 8 hours. Grey shading indicates 95% CI; 0.95, 95<sup>th</sup> percentile; 0.75, 75<sup>th</sup> percentile; 0.5, 50<sup>th</sup> percentile; 0.25, 25<sup>th</sup> percentile; 0.05, 5<sup>th</sup> percentile;

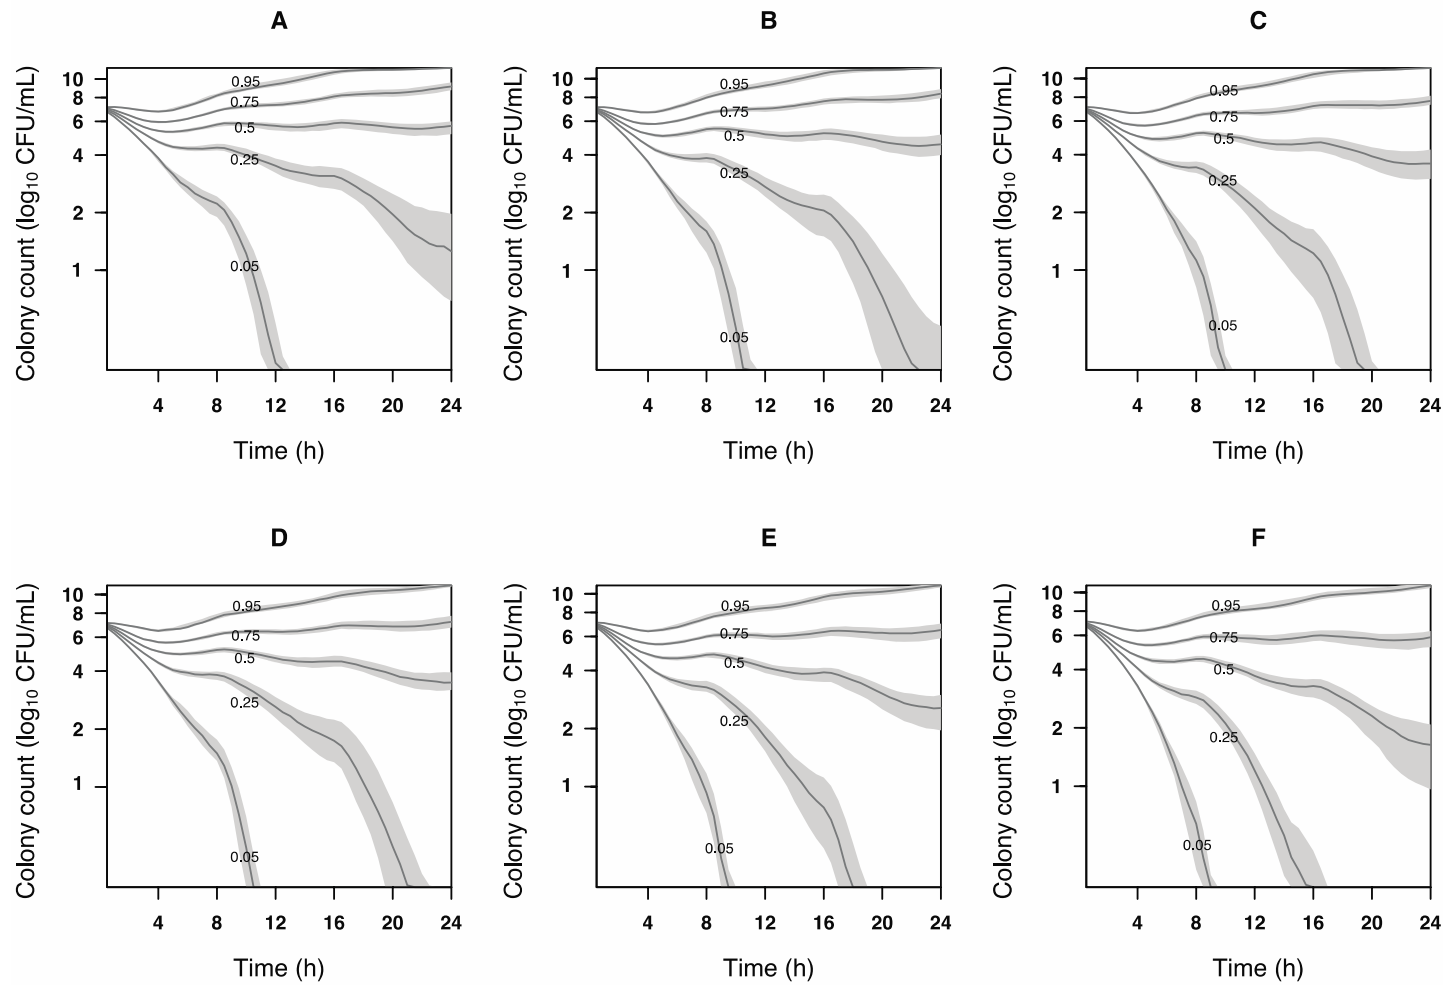

Figure S3: Simulated viable count profiles of carbapenem-resistant *A. baumannii* isolate #79 for combination regimens of sulbactam 3 g q8h with (A) fosfomycin 4 g q8h; (B) fosfomycin 6 g q8h; (C) fosfomycin 8 g q8h, and sulbactam 4 g q8h with (D) fosfomycin 4 g q8h; (E) fosfomycin 6 g q8h; (F) fosfomycin 8 g q8h. Grey shading indicates 95% CI; 0.95, 95<sup>th</sup> percentile; 0.75, 75<sup>th</sup> percentile; 0.5, 50<sup>th</sup> percentile; 0.25, 25<sup>th</sup> percentile; 0.05, 5<sup>th</sup> percentile; q8h, every 8 hours.

Table S1: Population mean parameter estimates for fosfomycin-sulbactam combination models against four carbapenem- resistant *A.baumannii* isolates.

| Parameter                          | #79                |                    | #80                |                    | #99                   |                    | #110               |                    |
|------------------------------------|--------------------|--------------------|--------------------|--------------------|-----------------------|--------------------|--------------------|--------------------|
|                                    | Mean               | SD                 | Mean               | SD                 | Mean                  | SD                 | Mean               | SD                 |
| $K_{gs}$ ( $\log_{10}$ CFU/mL/h)   | 1.32               | 0.05               | 0.79               | 0.01               | 1.37                  | 0.57               | 1.10               | 0.89               |
| $K_{gr}$ ( $\log_{10}$ CFU/mL/h)   | 1.60               | 0.33               | 1.58               | 0.58               | 1.72                  | 0.23               | 1.93               | 0.07               |
| $B_{max}$ ( $\log_{10}$ CFU/mL)    | $4.76 \times 10^9$ | $6.31 \times 10^9$ | $8.55 \times 10^9$ | $8.14 \times 10^8$ | $3.01 \times 10^{10}$ | $8.41 \times 10^9$ | $6.14 \times 10^9$ | $4.71 \times 10^9$ |
| $E_{maxF}$ ( $\log_{10}$ CFU/mL/h) | 2.33               | 0.15               | 1.82               | 0.77               | 1.02                  | 0.87               | 1.19               | 0.89               |
| $E_{maxS}$ ( $\log_{10}$ CFU/mL/h) | 2.48               | 0.35               | 1.72               | 0.34               | 2.60                  | 0.50               | 1.89               | 0.86               |
| $H_F$                              | 0.78               | 0.24               | 0.98               | 0.47               | 0.39                  | 0.04               | 0.86               | 0.22               |
| $EC_{50_{Fs}}$ (mg/L)              | 6.65               | 9.26               | 91.39              | 55.84              | 4.27                  | 0.44               | 82.01              | 43.61              |
| $EC_{50_{Fr}}$ (mg/L)              | 99.67              | 36.51              | 17.21              | 26.25              | 127.73                | 0.15               | 63.83              | 20.68              |
| $H_S$                              | 1.31               | 0.49               | 2.33               | 1.08               | 1.47                  | 0.29               | 2.25               | 0.86               |
| $EC_{50_{Ss}}$ (mg/L)              | 35.47              | 12.77              | 58.98              | 45.19              | 36.63                 | 34.68              | 70.18              | 48.03              |
| $EC_{50_{Sr}}$ (mg/L)              | 74.39              | 18.72              | 81.79              | 21.02              | 99.21                 | 4.65               | 95.99              | 30.28              |
| $INT_{FS}$                         | 0.89               | 0.15               | -0.40              | 0.09               | -0.53                 | 0.06               | -0.13              | 0.09               |
| $HI_{FS}$                          | 1.17               | 0.56               | 1.98               | 0.60               | 0.61                  | 0.91               | 2.66               | 0.32               |
| $EC_{50_{INT_{Fs}}}$ (mg/L)        | 16.24              | 21.51              | 40.91              | 27.94              | 4.24                  | 7.25               | 49.10              | 30.75              |
| $CFU_r$ ( $\log_{10}$ CFU/mL)      | $2.39 \times 10^4$ | $2.52 \times 10^4$ | $3.45 \times 10^2$ | $4.50 \times 10^2$ | $8.51 \times 10^3$    | $4.63 \times 10^3$ | $2.89 \times 10^4$ | $1.83 \times 10^4$ |

SD, standard deviation;  $CFU_s$  and  $CFU_r$  represent the bacterial burden for the sensitive and resistant bacterial subpopulations, respectively;  $K_{gs}$  and  $K_{gr}$  represent the growth rate constant for the sensitive and resistant bacterial subpopulations, respectively;  $B_{max}$  is the maximal bacterial burden;  $E_{maxF}$  and  $E_{maxS}$  represent the maximum rate of fosfomycin- and sulbactam-mediated bacterial killing, respectively ( $\log_{10}$  CFU/mL/h);  $C_F$  and  $C_S$  represent the concentration of fosfomycin and sulbactam, respectively;  $H_F$  and  $H_S$  represent the power parameter (Hill coefficient) for fosfomycin and sulbactam effect on both subpopulations, respectively;  $EC_{50_{Fs}}$  and  $EC_{50_{Ss}}$  represent the fosfomycin and sulbactam concentration for which effect is 50% on the sensitive subpopulation, respectively;  $EC_{50_{Fr}}$  and  $EC_{50_{Sr}}$  represent the fosfomycin and sulbactam concentration for which effect is 50% on the resistant subpopulation, respectively;  $INT_{FS}$  represents the maximum fractional change of the  $EC_{50_{Ss}}$  and  $EC_{50_{Sr}}$  caused by fosfomycin;  $HI_{FS}$  represents the power parameter (Hill coefficient) for fosfomycin potentiation of sulbactam effect;  $EC_{50_{INT_{Fs}}}$  represents the fosfomycin concentration needed to achieve 50% of  $INT_{FS}$ .
